# Supplementary material
Source: publisher figshare collection journal article supplement (https://springernature.figshare.com/ndownloader/files/15323189)

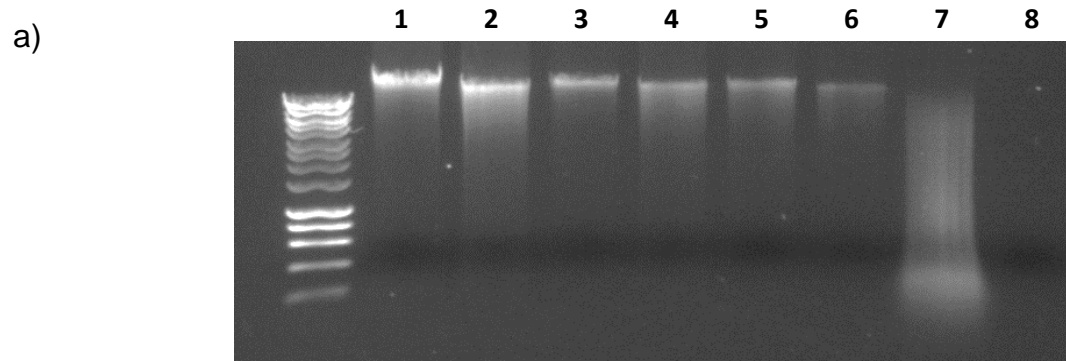

b) Stacks

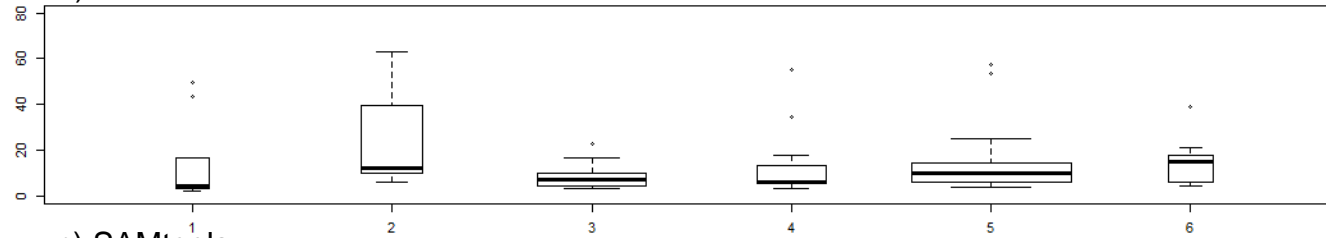

c) SAMtools

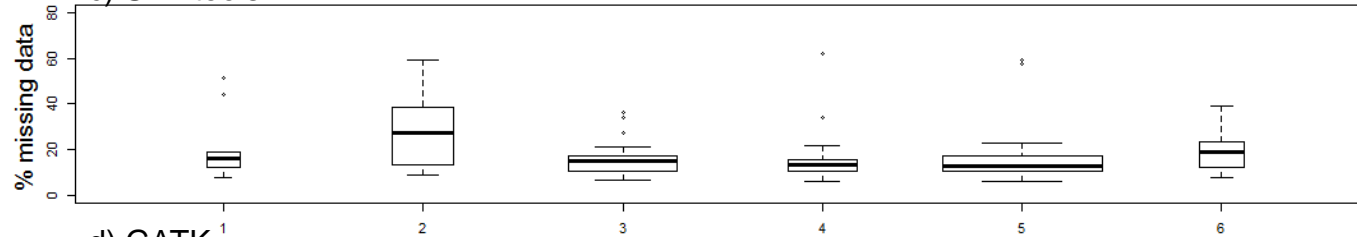

d) GATK

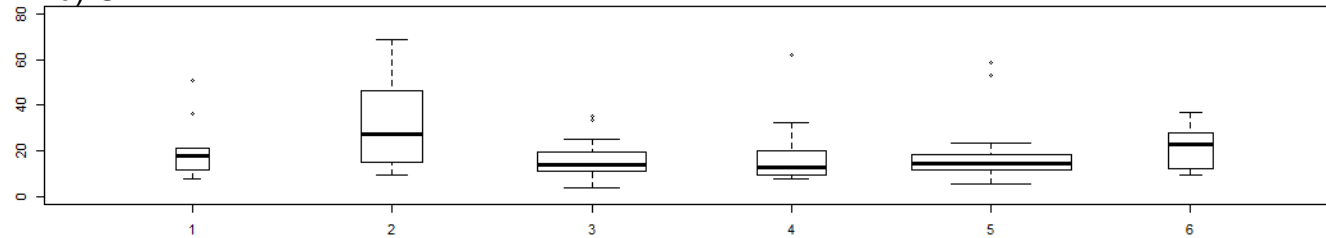

Gel quality rank

Supplement: Supplementary file 1 [file 15323189]

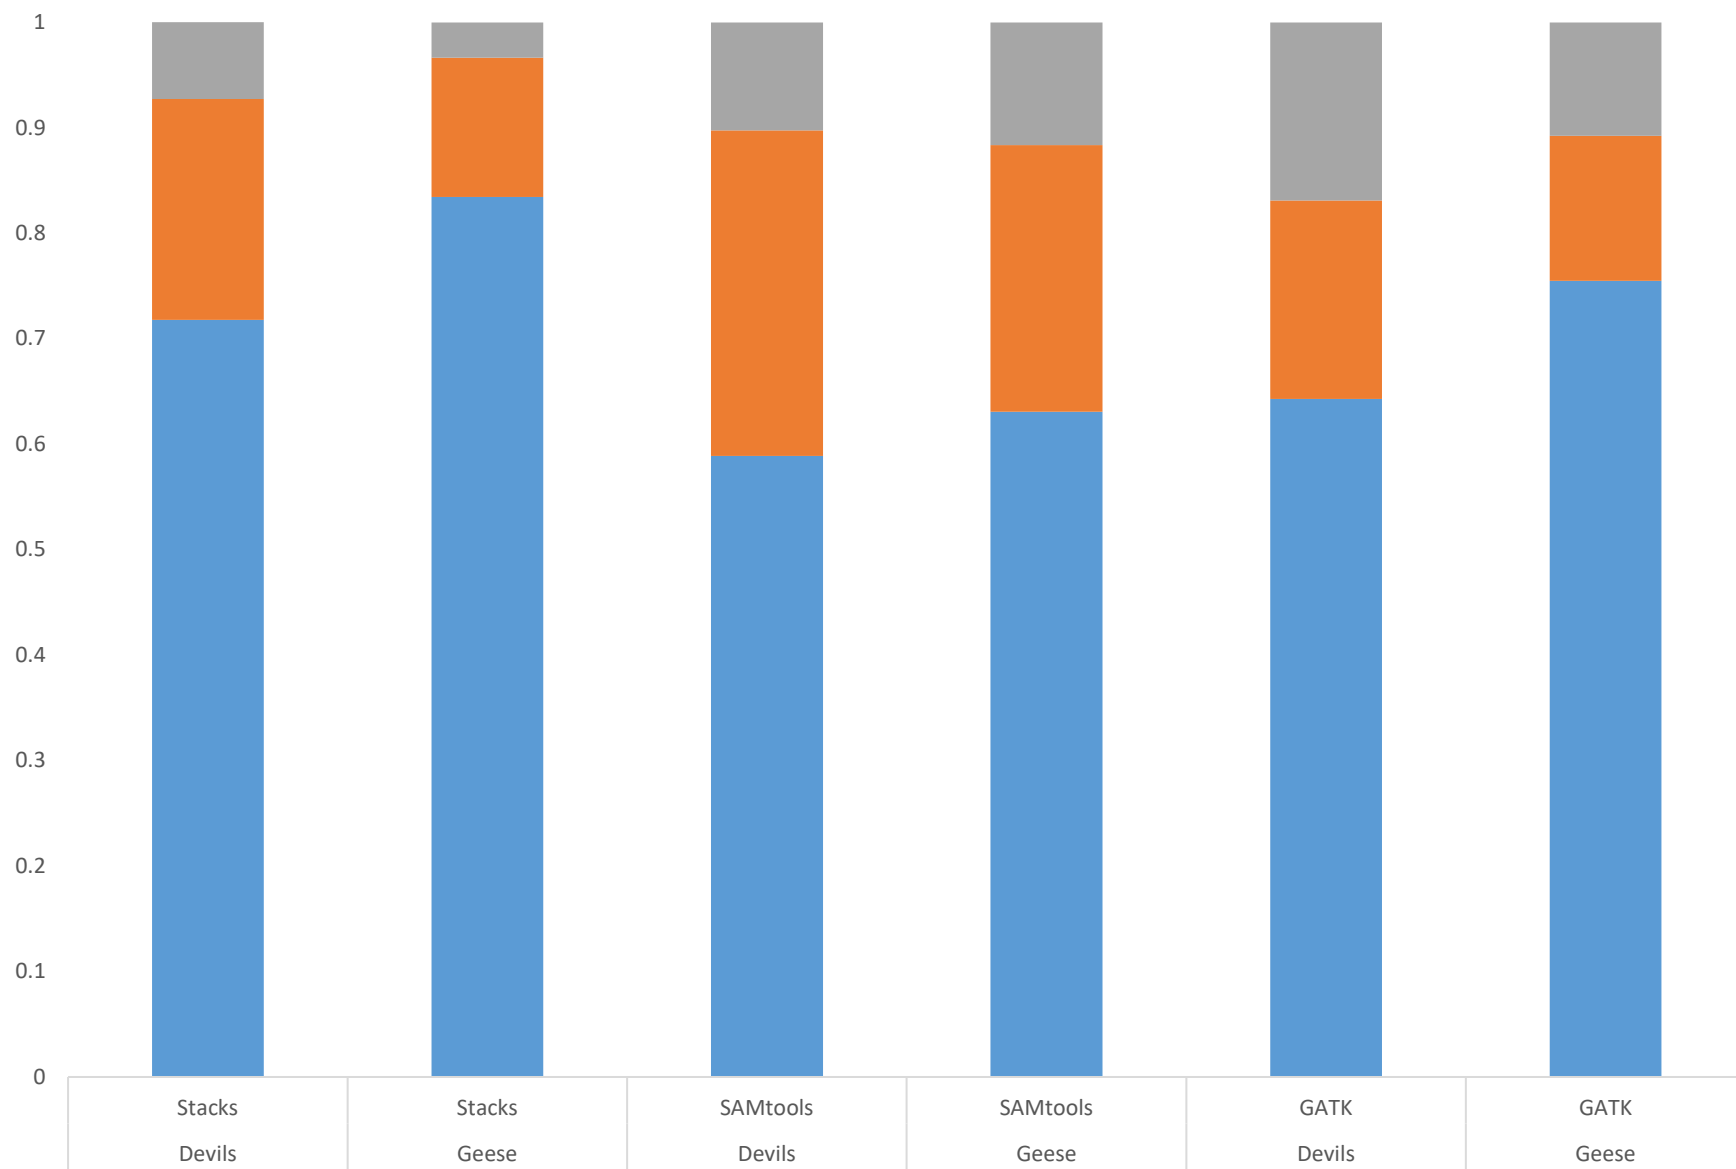

Supplement: Supplementary file 2 [file 15323189]
